# Supplementary material for: Poison-Exon Inclusion in DHX9 Reduces Its Expression and Sensitizes Ewing Sarcoma Cells to Chemotherapeutic Treatment
Source: PubMed Central journal article supplement (PMC7072589; doi:10.3390/cells9020328), 2020-01-31
Supplement: cells-09-00328-s001.pdf [file cells-09-00328-s001.pdf]

*Appendix A*

# **Poison-exon inclusion in DHX9 reduces its expression and sensitizes Ewing sarcoma cells to chemotherapeutic treatment**

**Ramona Palombo<sup>1</sup>, Veronica Verdile<sup>1,2</sup> and Maria Paola Paronetto<sup>1,2,\*</sup>**

<sup>1</sup> Laboratory of Cellular and Molecular Neurobiology, IRCCS Fondazione Santa Lucia, Rome, Italy

<sup>2</sup> Università degli Studi di Roma "Foro Italico", Piazza Lauro de Bosis, 15, Rome, Italy

\* Correspondence: mariapaola.paronetto@uniroma4.it;

*Supplementary Figure Legends 1-4*

*Supplementary Figures 1-4*

*Supplementary Table 1.* List of oligonucleotides used in the siRNA library.

*Supplementary Table 2.* List of primers.

**Supplementary Figure 1.** RT-qPCR analysis to monitor the inclusion of *DHX9* exon 6A normalized to the skipped isoform (junction exon 6-exon 7), upon knockdown of the indicated SR (A) and hnRNP (B) proteins. The reported values are the average ( $\pm$  S.D.) of three independent experiments and statistical analysis was performed by Student *t*-test comparing each siRNA to scrambled. (*p*-value: \*\*\*<0.001, \*\* <0.01, \*<0.05). (C) Western blot analysis to monitor the protein levels of SRSF1, SRSF3, hnRNPM, hnRNPK and hnRNPP (FUS) upon treatment with specific siRNA oligonucleotides. 20 $\mu$ g of total extracts were loaded on a 10% acrylamide gels. Histograms show the relative levels of the RBPs normalized to  $\beta$ -actin. The reported values are the average ( $\pm$  S.D.) of three independent experiments and statistical analysis was performed by Student *t*-test comparing each siRNA to scrambled (*p*-value: \*\*\*<0.001, \*\* <0.01, \*<0.05). (D) Western blot analysis to monitor the protein levels of EWS and EWS-FLI1 upon FUS knockdown, normalized to  $\beta$ -actin. The histogram on the right shows the densitometric analyses of three independent experiments. Statistical analysis was performed by Student *t*-test (*p*-value: \*<0.05).

**Supplementary Figure 2.** Pearson correlation analysis on Ewing sarcoma patients, between the expression of *DHX9* and either hnRNPL (A) or SRSF5 (B). Values are expressed as logarithmic with base 2. In each panel is reported the correlation value (R) and the relative *p*-value.

**Supplementary Figure 3.** HNRNPM and SRSF3 affects *DHX9* exon 6A inclusion in Ewing sarcoma. (A) and (B) RT-qPCR to monitor *DHX9* exon 6A inclusion in SK-N-MC (A) and LAP-35 (B) Ewing sarcoma cells, as indicated, upon knockdown of *HNRNPM* and *SRSF3*. (C) and (D) Western blot analysis upon transfection of scrambled, siHNRNPM or siSRSF3 oligonucleotides in SK-N-MC and LAP-35 Ewing sarcoma cells. The reported values are the average ( $\pm$  S.D.) of three independent experiments and statistical analysis was performed by Student *t*-test comparing each siRNA to scrambled (*p*-value: \*\*\*<0.001, \*\* <0.01, \*<0.05).

**Supplementary Figure 4.** Depletion of SRSF3 and hnRNPM increases doxorubicin sensitivity of Ewing sarcoma cells. (A) and (B) Dose-response curves of scrambled (black), siHNRNPM (red) and siSRSF3 (blue) in SK-N-MC (A) and LAP-35 (B) Ewing sarcoma cells after treatment with increasing concentration of doxorubicin (from 0 to 150 nM). Cells were collected at 72 hours after treatment. EC<sub>50</sub> values are reported on the bottom.

A

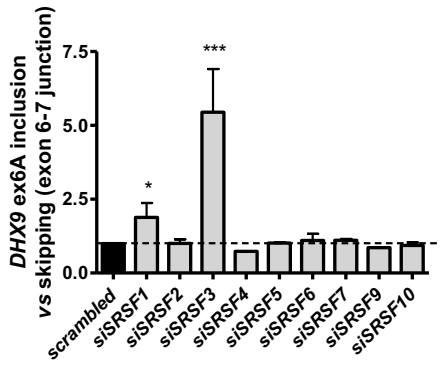

B

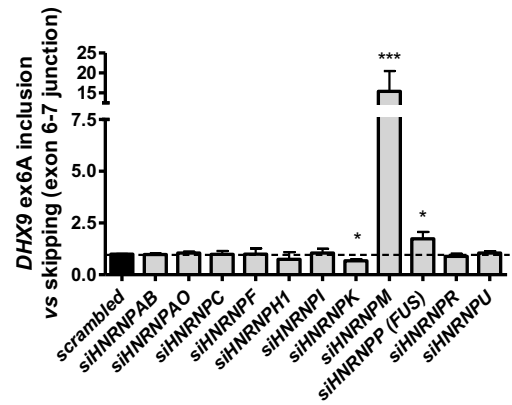

C

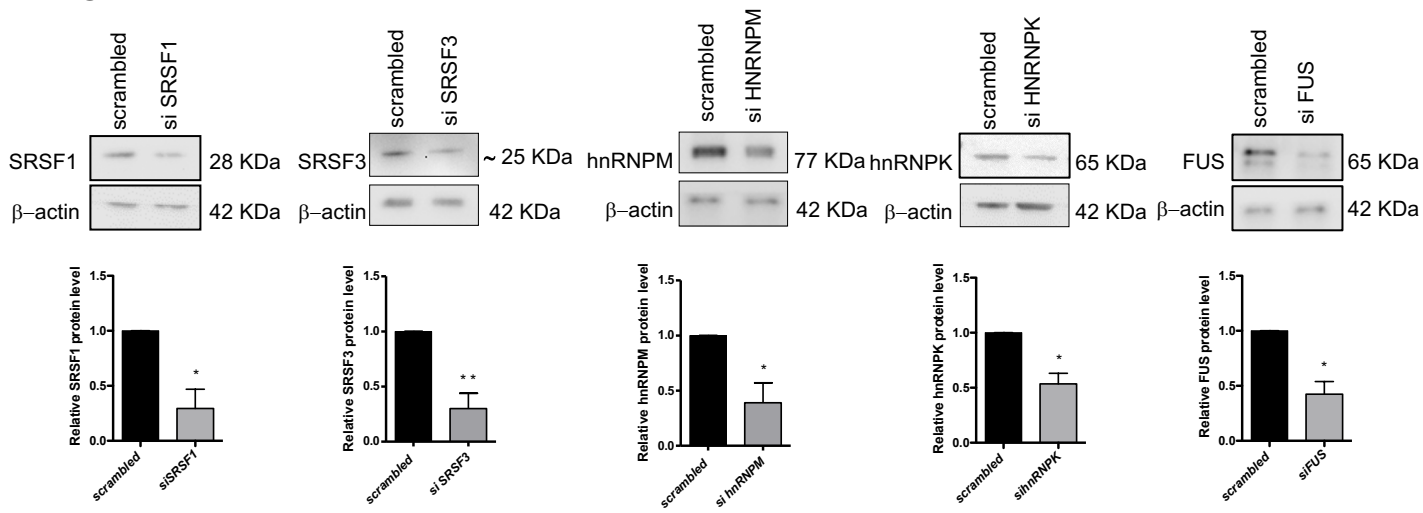

D

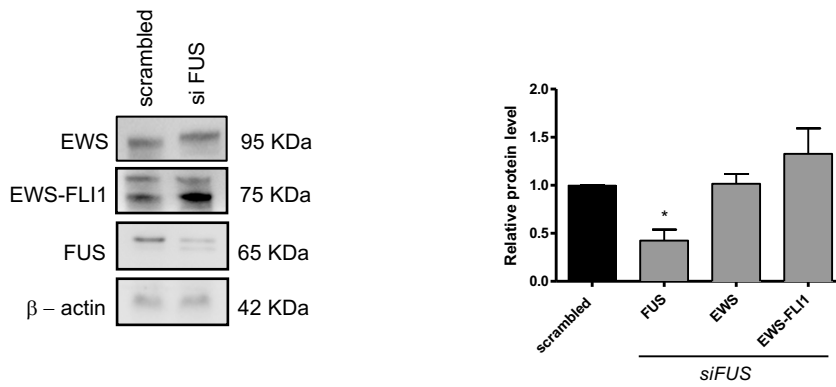

A

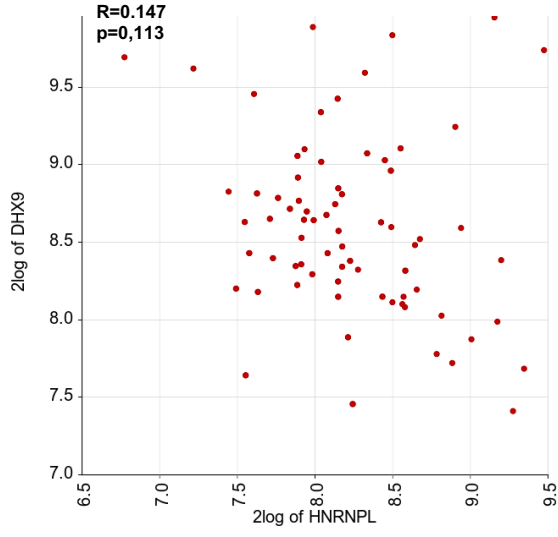

B

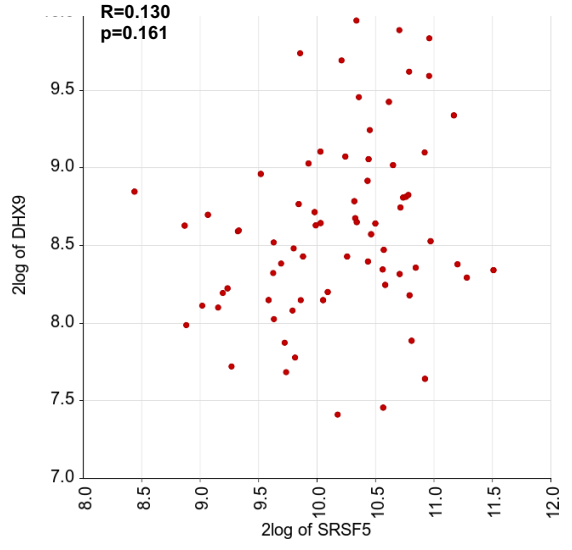

A

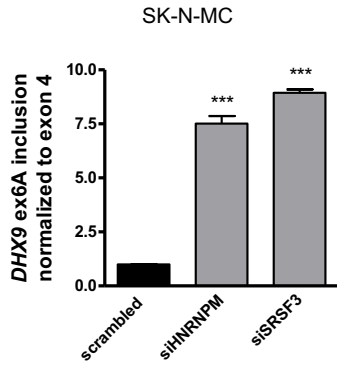

B

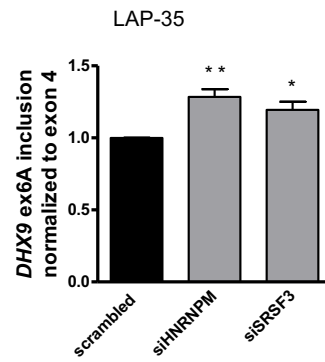

C

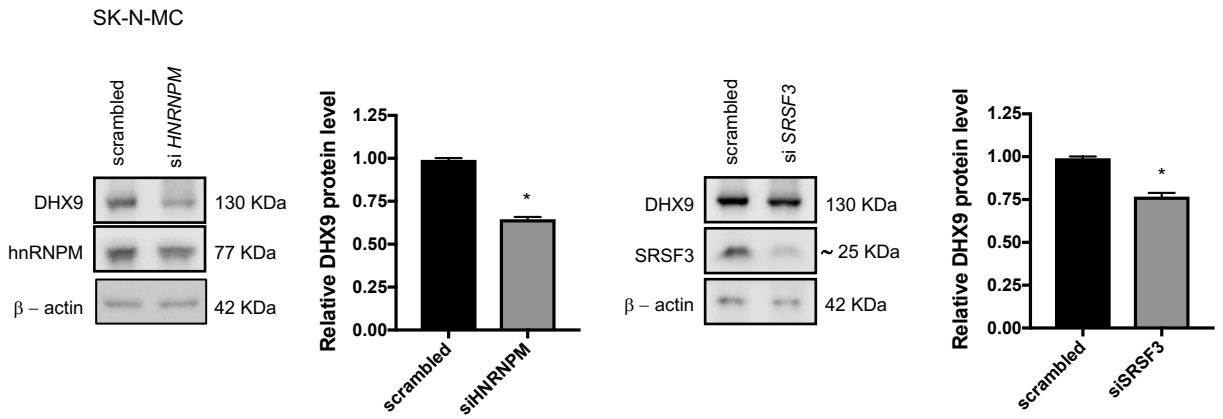

D

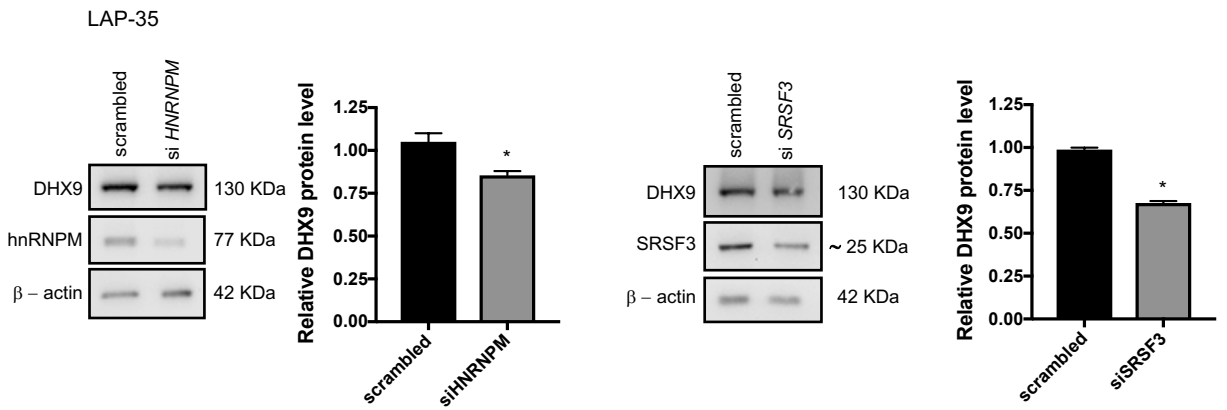

A

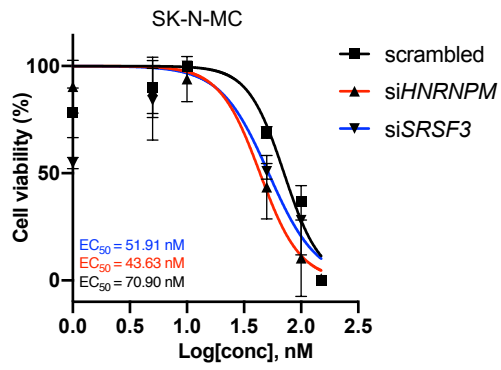

B

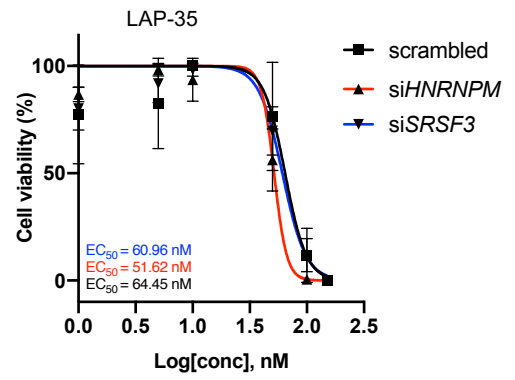

**Supplementary Table 1: siRNAs**

| <b>Mission siRNA (SIGMA)</b>            | <b>Cod.</b>        |
|-----------------------------------------|--------------------|
| siHNRNPAB                               | SASI_Hs01_00048471 |
| siHNRNPAO                               | SASI_Hs01_00149990 |
| siHNRNPC                                | SASI_Hs02_00312564 |
| siHNRNPF                                | SASI_Hs02_00318648 |
| siHNRNPH1                               | SASI_Hs01_00113607 |
| siHNRNPI                                | SASI_Hs01_00216643 |
| siHNRNPR                                | SASI_Hs02_00323053 |
| siHNRNPU                                | SASI_Hs01_00063626 |
| siSRSF1                                 | SASI_Hs02_00313260 |
| siSRSF2                                 | SASI_Hs01_00081729 |
| siSRSF3                                 | SASI_Hs01_00018995 |
| siSRSF4                                 | SASI_Hs01_00065340 |
| siSRSF5                                 | SASI_Hs01_00103981 |
| siSRSF6                                 | SASI_Hs02_00341239 |
| siSRSF7                                 | SASI_Hs01_00094911 |
| siSRSF9                                 | SASI_Hs01_00220732 |
| siSRSF10                                | SASI_Hs01_00162140 |
| Universal negative control #1           | SIC001             |
| <b>siRNA (Santa Cruz Biotechnology)</b> | <b>Cod.</b>        |
| siHNRNPK                                | sc-38282           |
| siHNRNPM                                | sc-38286           |
| siHNRNPP                                | sc-40563           |

**Supplementary Table 2.** List of primers.

| Primer                             | Sequence 5'- 3'        |
|------------------------------------|------------------------|
| β-actin_FW                         | CATGGAGTCCTGTGGCATC    |
| β-actin_REV                        | AGCACTGTGTTGGCGTACAG   |
| CCND1_FW                           | GTGCAAGGCCTGAACCTG     |
| CCND1_REV                          | CGGGTCACACTTGATCACTC   |
| c-MYC_FW                           | CTCCACCTCCAGCTTGTACC   |
| c-MYC_REV                          | GCTGTCGTTGAGAGGGTAGG   |
| DHX9_EX4 FW gene expression        | ATCTCCGCCCCCACTTACT    |
| DHX9_EX4 REV gene expression       | GAGAGCCAGATGTGGAGGAA   |
| DHX9_EX6A FW alternative splicing  | GTCCTGATCACAACAGGTGG   |
| DHX9_EX6A REV alternative splicing | GCTTTCAGGGGAACAACATC   |
| DHX9_EX6A FW CLIP                  | GGAGGAGAATGAGATTGAGTGC |
| DHX9_EX6A REV CLIP                 | GCTTTCAGGGGAACAACATC   |
| DHX9_i6 FW CLIP                    | TTATTACTCCCAGGAAGGC    |
| DHX9_i6 FW CLIP                    | GGAATCATTCAAAAAGGTTTCC |
| EZH2_FW                            | ATAACAGTAGCAGGCCCAGC   |
| EZH2_REV                           | GTTTCAGTCCCTGCTTCCCT   |
| hnRNPAB_FW                         | GCTACGACTACTCGCCCTATG  |
| hnRNPAB_REV                        | CGATCAGTTGGTCGCTCCTG   |
| hnRNPAO_FW                         | AGGCCGAGATTATTGCCGAC   |
| hnRNPAO_REV                        | TATCCTCCTTGGGGACTGCT   |
| hnRNPC_FW                          | CACCCTTCCTGGGTGATGTT   |
| hnRNPC_REV                         | TGAACAGAGCAGCCCACAAT   |
| hnRNPF_FW                          | CCGCCAAAACACGTTTACCG   |



|             |                       |
|-------------|-----------------------|
| hnRNPF_REV  | GGGAAACTCCAGGTGCATGT  |
| hnRNPH1_FW  | CAGTTCAGCGACCACGTTTG  |
| hnRNPH1_REV | CACCACGAATCCCTCTCCAC  |
| hnRNPI_FW   | TTTTCCAAGCTCACCAGCCT  |
| hnRNPI_REV  | TATACCAGGTGCACCGAAGG  |
| hnRNPK_FW   | CGCTCGTTTTCTGTCTAGCTC |
| hnRNPK_REV  | ACAAGTACACCCCAAGTGC   |
| hnRNPM_FW   | AGTATGGCTGGTGTGGTGGT  |
| hnRNPM_REV  | TTGCACAGCTTCAATGGACT  |
| hnRNPP_FW   | AGGCCTGGGTGAGAATGTTA  |
| hnRNPP_REV  | GCTGTCCCGTTTTCTTGTTT  |
| hnRNPR_FW   | TCAGGTGAATGGTAATGCGGT |
| hnRNPR_REV  | GGCCTGCCTCTATCAGTGTC  |
| hnRNPU_FW   | CAGCAGCAGGCGGGAG      |
| hnRNPU_REV  | GTGGCTGAGGAGATTTGGCT  |
| ID2_FW      | CCCAGAACAAGAAGGTGAGC  |
| ID2_REV     | ATAGTGGGATGCGAGTCCAG  |
| NR0B1_FW    | CCAGGTCCAAGCCATCAAGT  |
| NR0B1_REV   | TAAAGAGCACGGTCCCCTTG  |
| SRSF1_FW    | CCGCATCTACGTGGGTAAGT  |
| SRSF1_REV   | GCGATTCTTGAGGTGATGT   |
| SRSF2_FW    | TCCAAGTCCAAGTCCTCGTC  |
| SRSF2_REV   | TTGGATTCCCTCTTGACAC   |
| SRSF3_FW    | TTGGAACGGGCTTTTGGCTA  |
| SRSF3_REV   | CCATCTAGCTCTCGGACTGC  |

|            |                        |
|------------|------------------------|
| SRSF4_FW   | CAAGCCAGGTTCCAGACGAC   |
| SRSF4_REV  | CGGGAATGTCTGCTTCGAGA   |
| SRSF5_FW   | GAAGGGGTGGTTGAGTTTGC   |
| SRSF5_REV  | CGGGATCGAGACCTGCTTC    |
| SRSF6_FW   | GGTCACGAAGTAGGAGTCGC   |
| SRSF6_REV  | ACGTGATCGACCTTTGCTCC   |
| SRSF7_FW   | GCAGAAGATGCAGTACGAGG   |
| SRSF7_REV  | TCGGGCAGGTGGTCTATCAA   |
| SRSF9_FW   | TATGCCCTGCGTAAACTGGA   |
| SRSF9_REV  | CCAGACCGAGACCGTGAGTA   |
| SRSF10_FW  | AGCCAAGGAAGGGAGGAATGT  |
| SRSF10_REV | ACCGACTTCTTGATCTCCTCCT |
